# Supplementary material
Source: PubMed Central journal article supplement (PMC5134331)
Supplement: NIHMS831120-supplement-01.pdf [file NIHMS831120-supplement-01.pdf]

34 Supplemental Figure 1: Height of Patient 1 (A), 2 (B) and 3 (C), plotted on sex specific  
35  
36  
37  
38 CDC growth charts, length in cm over age in years. Note similarity of the growth  
39  
40 patterns.  
41  
42  
43

44 Supplemental Figure 2: Brain MRI in Patient 1 at 1.5 (A-B) and 5 (C-D) years, Patient 2  
45  
46 at 8.5 years (E-F) and Patient 3 at 1.5 years (G-H), CT scan in Patient 4 at 21 years (I-  
47  
48 J), and a normal (control) MRI at 3 years (K-L). The images consist of 3D or T2-  
49  
50 weighted MRI or CT axial images at the level of the lateral ventricles (first and fourth  
51  
52 columns), and 3D or T1-weighted MRI or CT midline sagittal images (second and third  
53  
54 columns). These images show minor abnormalities including prominent forehead in all  
55  
56  
57  
58  
59  
60

1  
2  
3 four patients, mild ventriculomegaly in three (asterisks in A, D, H and I), and subtle  
4  
5  
6 downward displacement of the tonsils in two (short white arrows in B and G) that is seen  
7  
8  
9 in normal individuals and more often in those with relatively large head and brain size.  
10  
11 In patient 1, mild downward displacement of the tonsils at 1.5 years progressed to a  
12  
13 mild Chiari 1 malformation by 5 years (line and long arrow in C). Patient 4 has a classic  
14  
15 Dandy-Walker malformation (long arrow in J) consisting of small and upwardly rotated  
16  
17 vermis, cystic enlargement of the 4th ventricle, and enlarged posterior fossa with  
18  
19 elevated torcula.  
20  
21  
22  
23  
24  
25  
26  
27  
28  
29  
30  
31  
32  
33  
34  
35  
36  
37  
38  
39  
40  
41  
42  
43  
44  
45  
46  
47  
48  
49  
50  
51  
52  
53  
54  
55  
56  
57  
58  
59  
60

1  
2  
3  
4  
5  
6  
7  
8  
9  
10  
11  
12  
13  
14  
15  
16  
17  
18  
19  
20  
21  
22  
23  
24  
25  
26  
27  
28  
29  
30  
31  
32  
33  
34  
35  
36  
37  
38  
39  
40  
41  
42  
43  
44  
45  
46  
47  
48  
49  
50  
51  
52  
53  
54  
55  
56  
57  
58  
59  
60

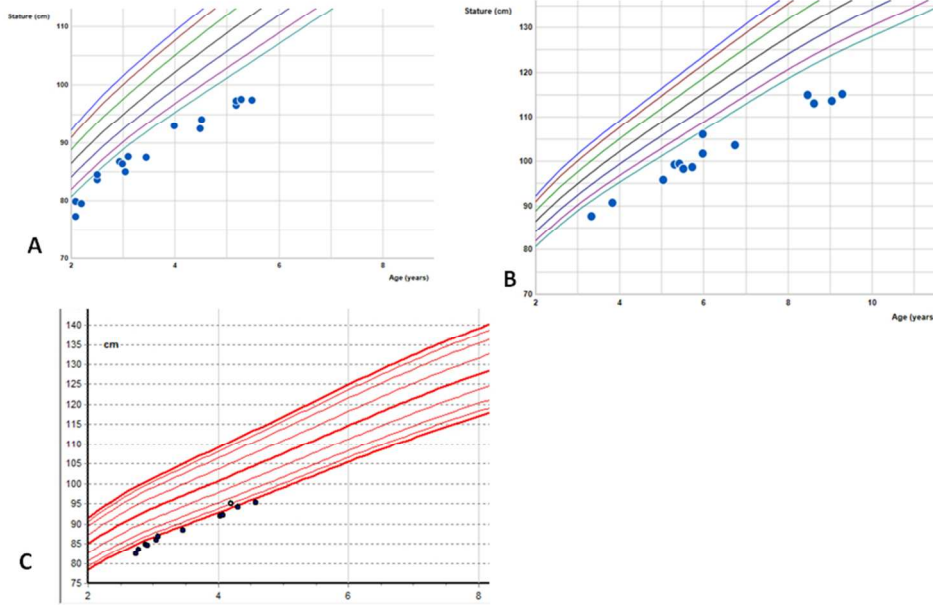

254x190mm (96 x 96 DPI)

Review

1  
2  
3  
4  
5  
6  
7  
8  
9  
10  
11  
12  
13  
14  
15  
16  
17  
18  
19  
20  
21  
22  
23  
24  
25  
26  
27  
28  
29  
30  
31  
32  
33  
34  
35  
36  
37  
38  
39  
40  
41  
42  
43  
44  
45  
46  
47  
48  
49  
50  
51  
52  
53  
54  
55  
56  
57  
58  
59  
60

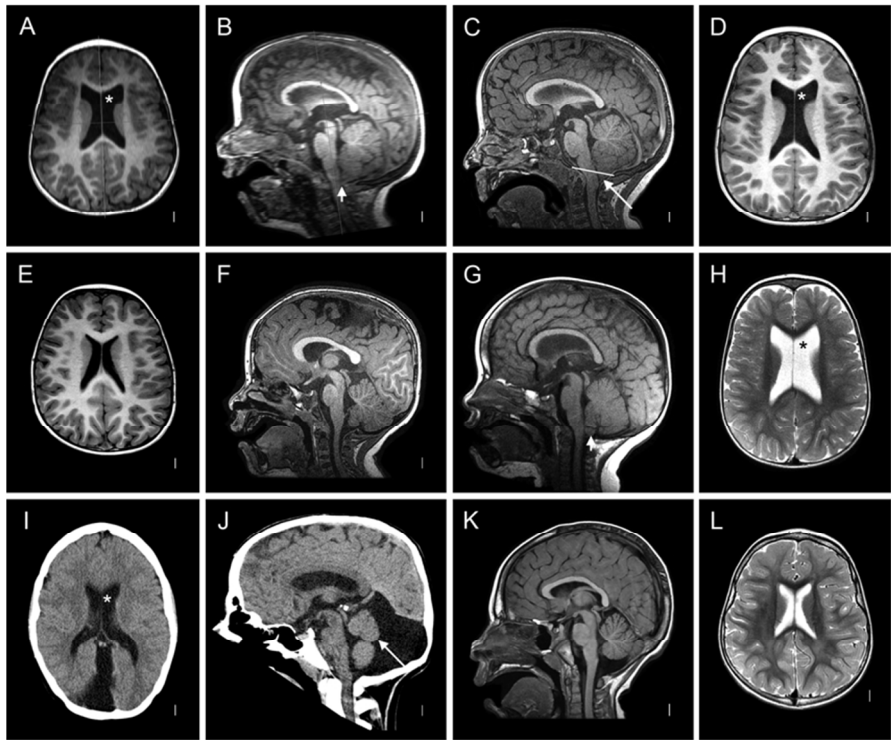

254x190mm (96 x 96 DPI)

Review
